# Supplementary material for: Tiny Object Detection in Aerial Traffic Surveillance using YOLOv10-Nano
Source: Research Square preprint supplement (doi:10.21203/rs.3.rs-6979027/v1), 2025-06-27
Supplement: Supplementary file 1 [file 7a9a5d8e1ca1697783043ff8.pdf]

# Declaration

## List of Abbreviations

- **YOLO**: You Only Look Once
- **mAP**: Mean Average Precision
- **FPS**: Frames Per Second
- **ERAC**: Efficient Receptive Aggregation Convolution
- **CSP**: Cross Stage Partial
- **BiFPN**: Bidirectional Feature Pyramid Network
- **ITS**: Intelligent Transportation Systems
- **CIoU**: Complete Intersection over Union
- **GPU**: Graphics Processing Unit

## Ethics Approval and Consent to Participate

Not applicable. This study does not involve human participants, human data, human tissue, animals, or plants.

## Consent for Publication

Not applicable. This manuscript does not contain any individual person's data in any form.

## Availability of Data and Materials

All datasets used and generated during this study are available publicly on IEEE DataPort at the following DOI:

<https://dx.doi.org/10.21227/p03g-ff98>

The dataset includes preprocessed VisDrone images, annotations in YOLO format, pretrained models, and scripts for evaluation and deployment.

## Competing Interests

The authors declare that they have no competing financial or non-financial interests related to this work.

## Funding

This research did not receive any specific grant from funding agencies in the public, commercial, or not-for-profit sectors.

## Authors' Contributions

**Bonala Shanmukesh:** Designed the experimental workflow, prepared the dataset, trained and evaluated the models, and wrote the initial draft of the manuscript.

*Student, SCOPE , VIT-AP Amaravathi, AndhraPradesh, India.*

[Shanmukesh.bonala@gmail.com](mailto:Shanmukesh.bonala@gmail.com)

(91+) 9989278339

**ORCID:** 0009-0008-3651-4077

**Dr. Edara Sreenivasa Reddy:** Provided technical supervision, helped interpret results, reviewed the manuscript critically for important intellectual content, and approved the final version for submission.

*professor , SCOPE , VIT-AP Amaravathi, AndhraPradesh, India.*

[sreenivasareddy.e@vitap.ac.in](mailto:sreenivasareddy.e@vitap.ac.in)

(91+) 7893111985

**ORCID :** 0000-0001-7347-2680

**Both authors have read and approved the final manuscript.**
